# Supplementary material for: Liver Cancer Cell Lines Treated with Doxorubicin under Normoxia and Hypoxia: Cell Viability and Oncologic Protein Profile
Source: PubMed Central journal article supplement (PMC6678640; doi:10.3390/cancers11071024), 2019-07-20

## Supplementary information for: Liver cancer cell lines treated with doxorubicin and hypoxia: cell viability and oncologic protein profile

By Ilse R. Dubbelboer, Natasa Pavlovic, Femke Heindryckx, Erik Sjögren, and Hans Lennernäs

**Figure S1.** Measurement of HIF1 $\alpha$  and PDK1 on three liver cancer cell lines (HepG2, Huh7 and SNU449) cultured in normoxic and hypoxic conditions. Hypoxia was generated by adding CoCl<sub>2</sub> to the cell-culturing medium.

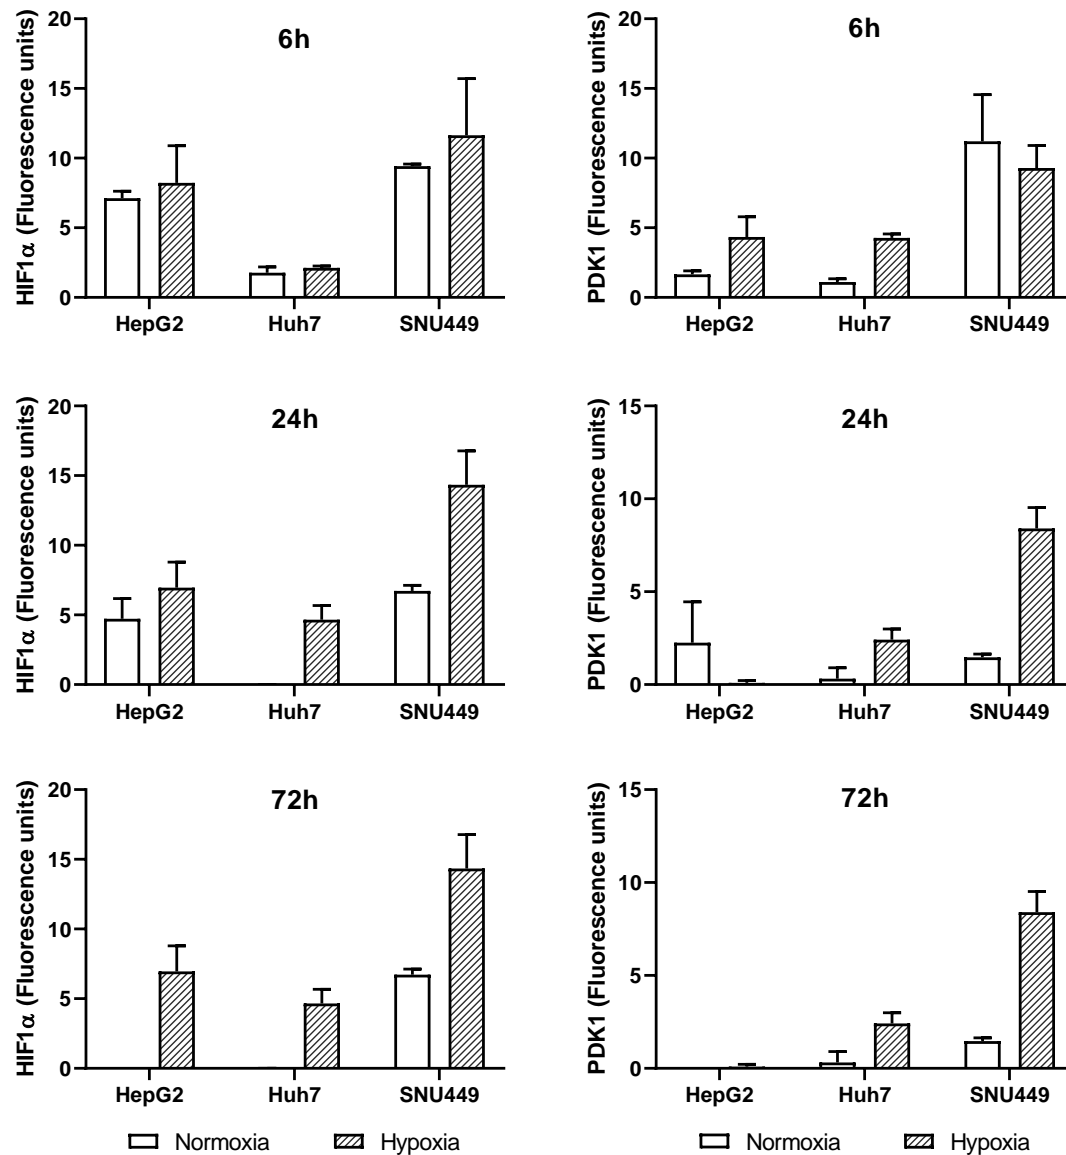

Supplementary information for: **Liver cancer cell lines treated with doxorubicin and hypoxia: cell viability and oncologic protein profile**

By Ilse R. Dubbelboer, Natasa Pavlovic, Femke Heindryckx, Erik Sjögren, and Hans Lennernäs

**Figure S2.** Normalized protein concentrations for each analyzed biomarker and all analyzed conditions and samples. This is the raw data, i.e. no processed data.

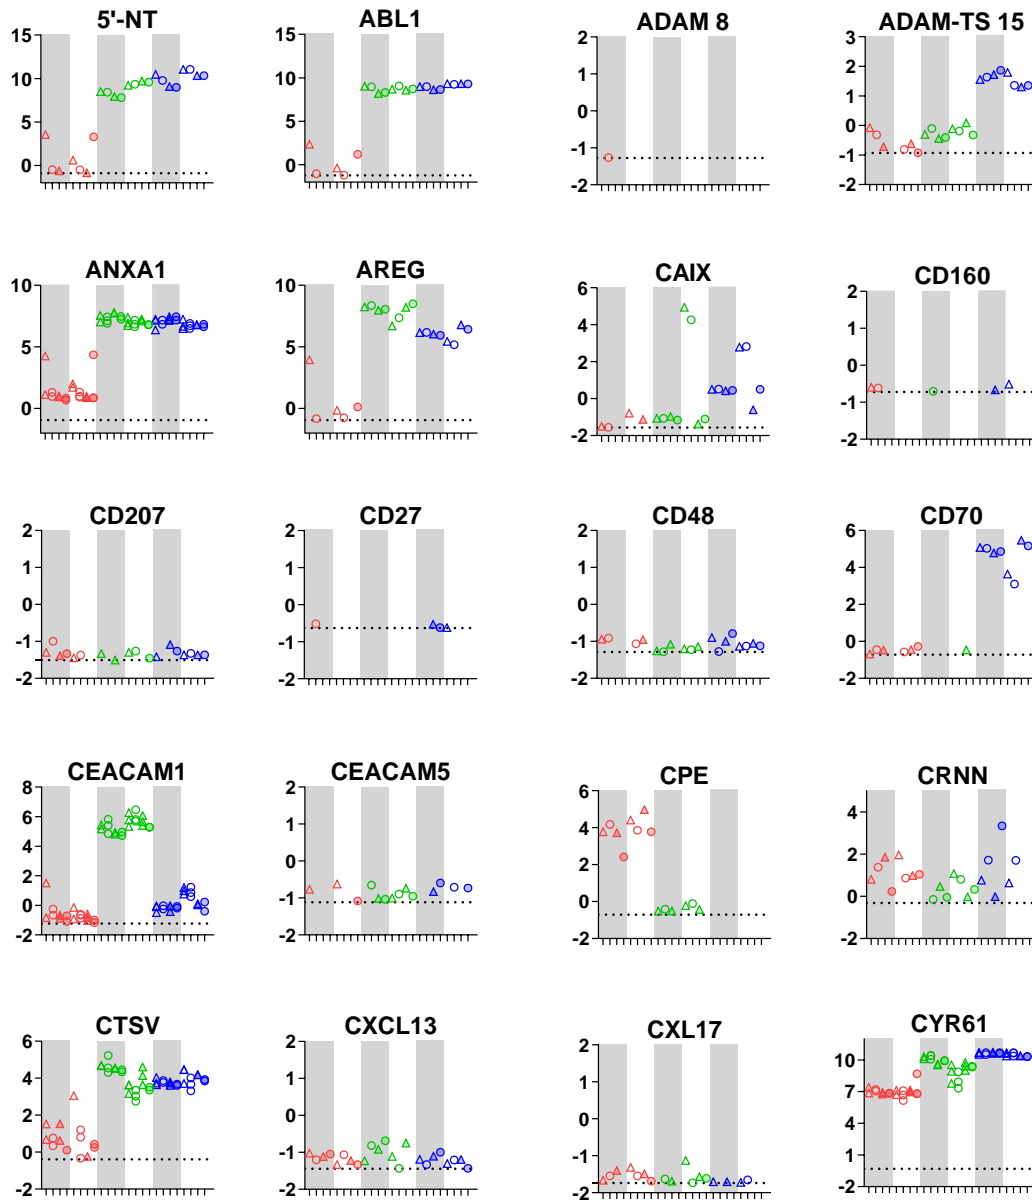

**Doxorubicin exposure:** Triangles: 0.1  $\mu$ M, Circles: 0  $\mu$ M

**Oxygen conditions:** Filled symbols: Normoxia, Open symbols: Hypoxia

**Exposure time:** Grey lines: 6h, White lines: 72h

**Cell lines:** HepG2, Huh7, SNU449

**Horizontal line:** LOQ of analysis method

Supplementary information for: **Liver cancer cell lines treated with doxorubicin and hypoxia: cell viability and oncologic protein profile**

By Ilse R. Dubbelboer, Natasa Pavlovic, Femke Heindryckx, Erik Sjögren, and Hans Lennernäs

Continuation Figure S2

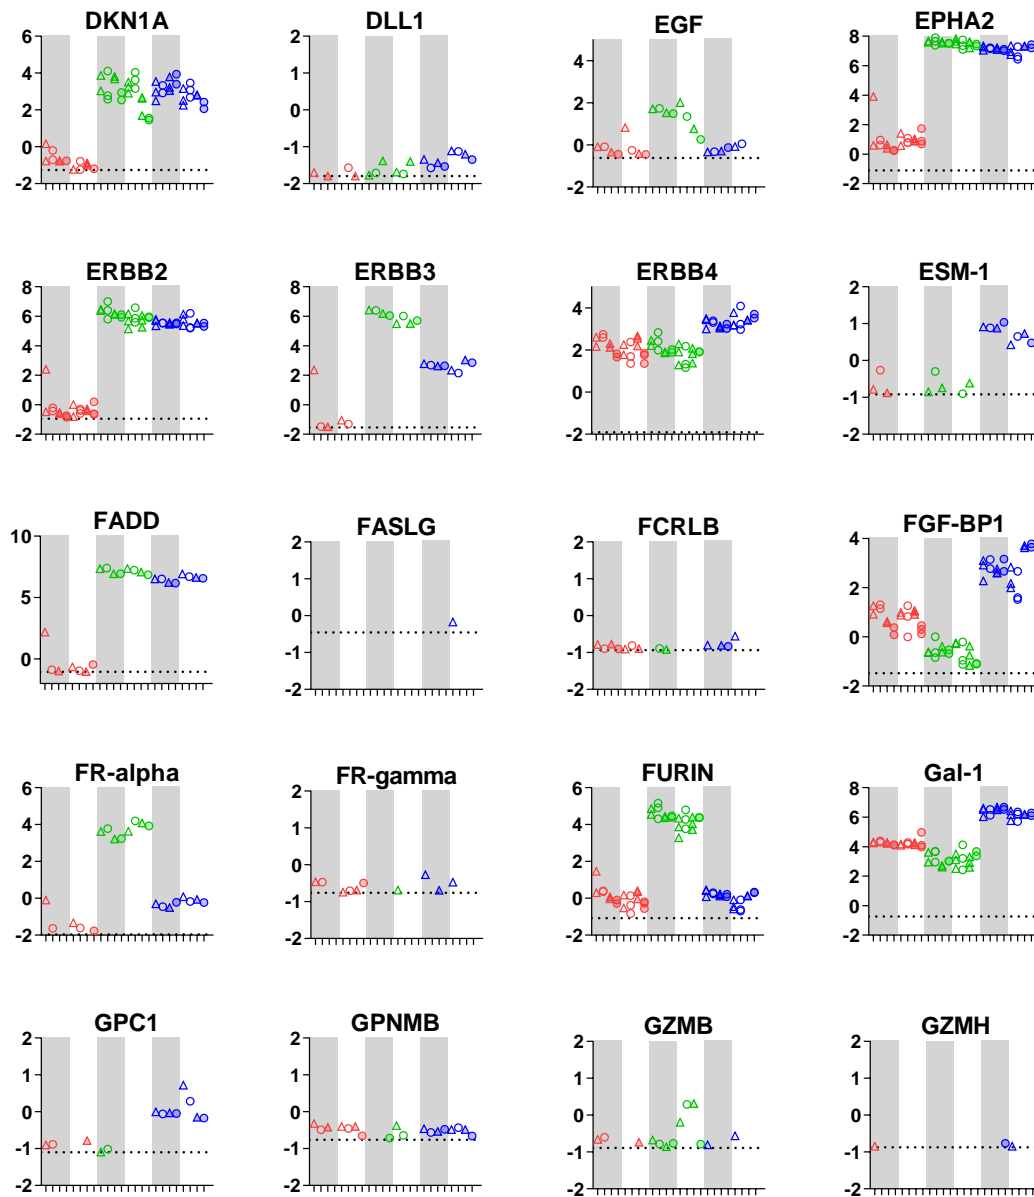

**Doxorubicin exposure:** Triangles: 0.1 μM, Circles: 0 μM  
**Oxygen conditions:** Filled symbols: Normoxia, Open symbols: Hypoxia  
**Exposure time:** Grey lines: 6h, White lines: 72h  
**Cell lines:** HepG2, Huh7, SNU449  
**Horizontal line:** LOQ of analysis method

Supplementary information for: **Liver cancer cell lines treated with doxorubicin and hypoxia: cell viability and oncologic protein profile**

By Ilse R. Dubbelboer, Natasa Pavlovic, Femke Heindryckx, Erik Sjögren, and Hans Lennernäs

Continuation Figure S2

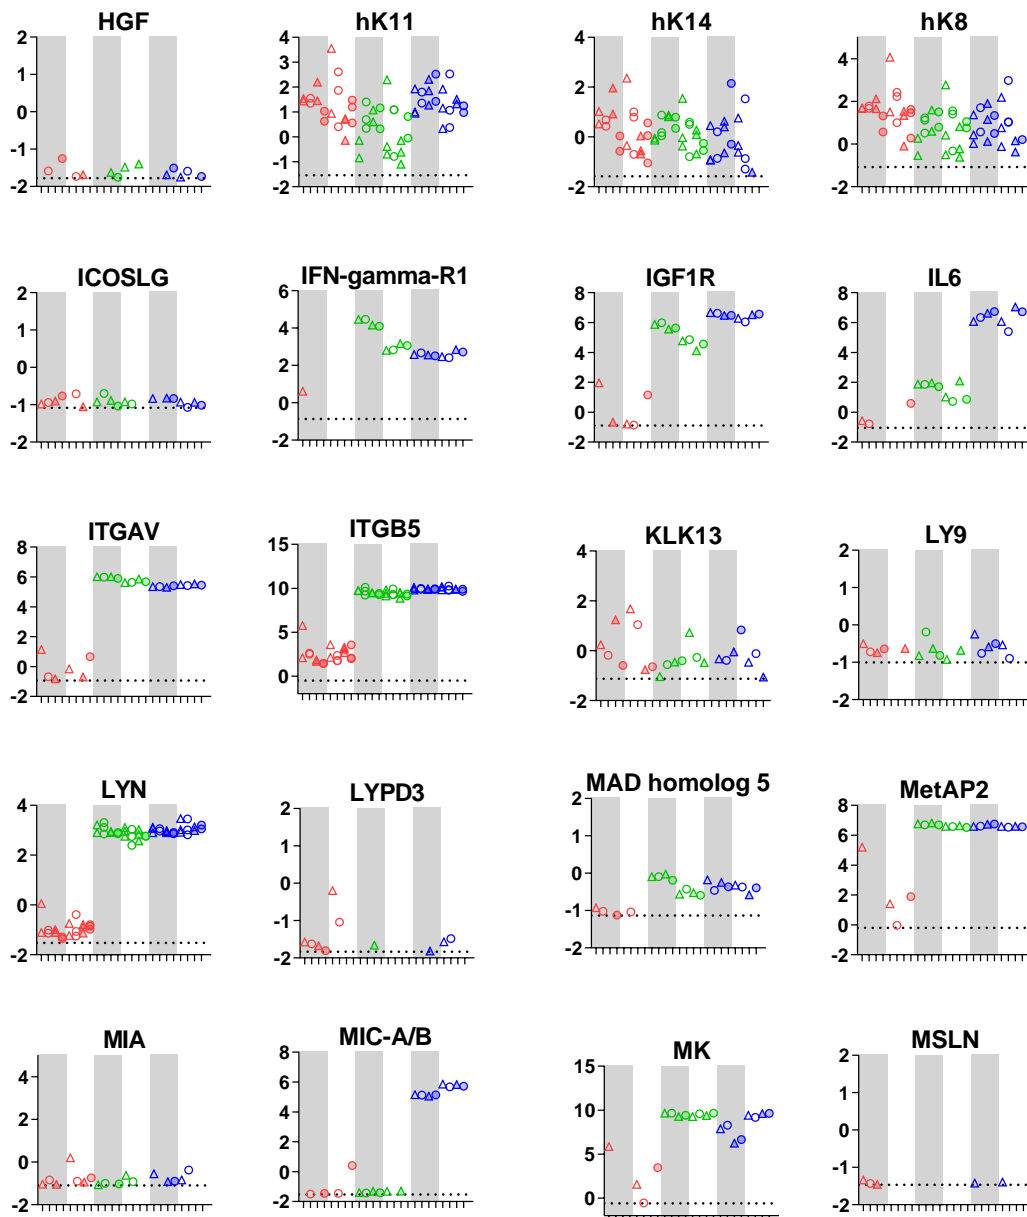

**Doxorubicin exposure:** Triangles: 0.1 μM, Circles: 0 μM

**Oxygen conditions:** Filled symbols: Normoxia, Open symbols: Hypoxia

**Exposure time:** Grey lines: 6h, White lines: 72h

**Cell lines:** HepG2, Huh7, SNU449

**Horizontal line:** LOQ of analysis method

Supplementary information for: **Liver cancer cell lines treated with doxorubicin and hypoxia: cell viability and oncologic protein profile**

By Ilse R. Dubbelboer, Natasa Pavlovic, Femke Heindryckx, Erik Sjögren, and Hans Lennernäs

Continuation Figure S2

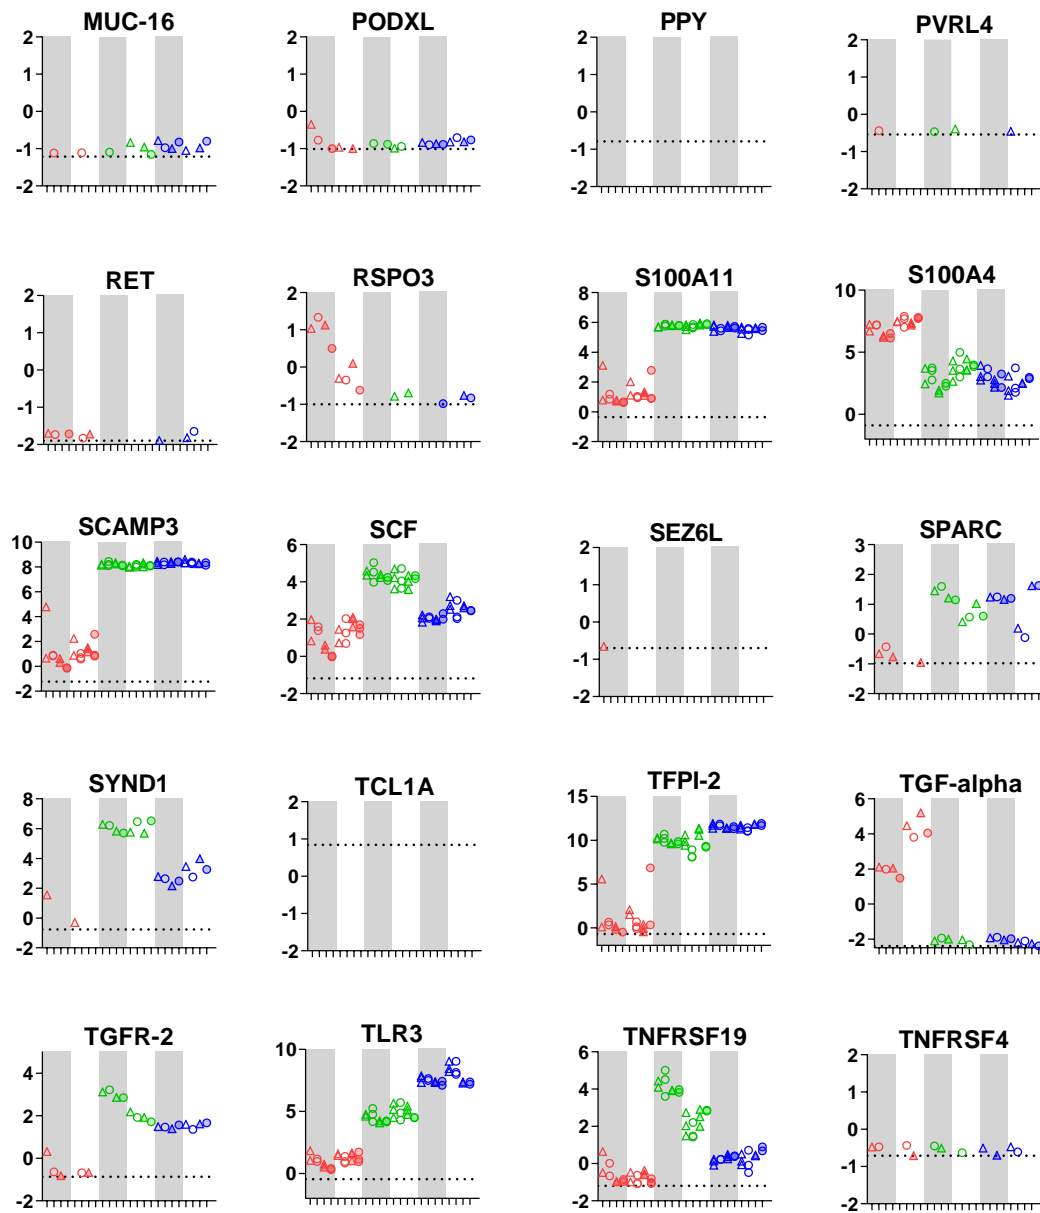

**Doxorubicin exposure:** Triangles: 0.1  $\mu$ M, Circles: 0  $\mu$ M  
**Oxygen conditions:** Filled symbols: Normoxia, Open symbols: Hypoxia  
**Exposure time:** Grey lines: 6h, White lines: 72h  
**Cell lines:** HepG2, Huh7, SNU449  
**Horizontal line:** LOQ of analysis method

Supplementary information for: **Liver cancer cell lines treated with doxorubicin and hypoxia: cell viability and oncologic protein profile**

By Ilse R. Dubbelboer, Natasa Pavlovic, Femke Heindryckx, Erik Sjögren, and Hans Lennernäs

Continuation Figure S2

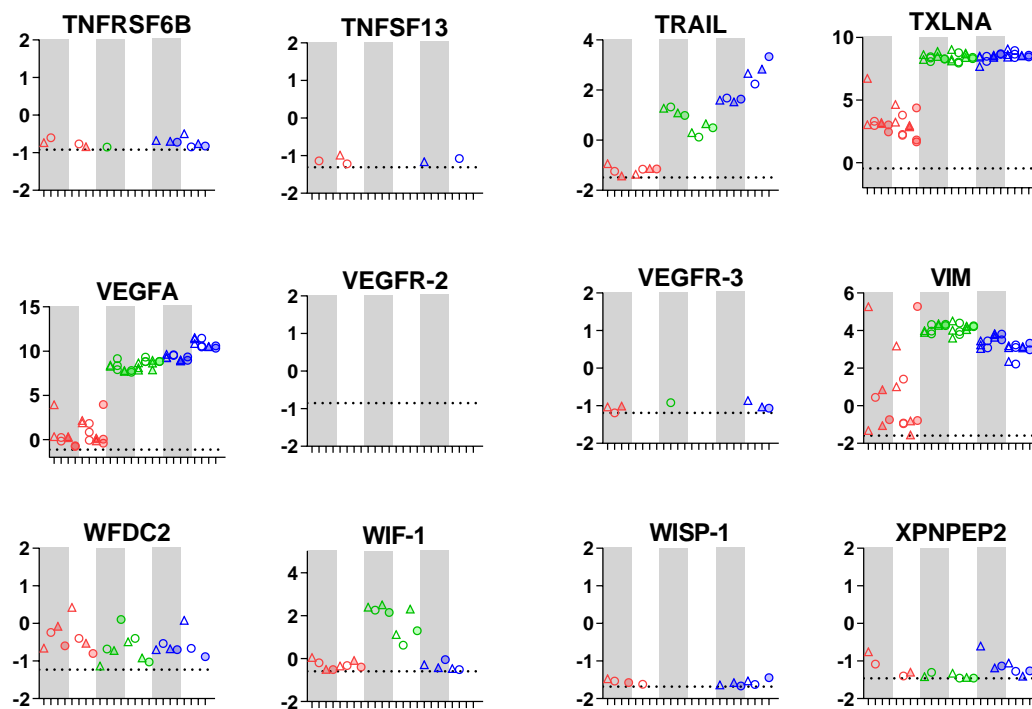

**Doxorubicin exposure:** Triangles: 0.1 μM, Circles: 0 μM  
**Oxygen conditions:** Filled symbols: Normoxia, Open symbols: Hypoxia  
**Exposure time:** Grey lines: 6h, White lines: 72h  
**Cell lines:** HepG2, Huh7, SNU449  
**Horizontal dotted line:** LOQ of analysis method

# Supplementary information for: Liver cancer cell lines treated with doxorubicin and hypoxia: cell viability and oncologic protein profile

By Ilse R. Dubbelboer, Natasa Pavlovic, Femke Heindryckx, Erik Sjögren, and Hans Lennernäs

**Figure S3.** Seeding density and cell viability after 24h. Cell viability was measured with a resazurin reduction assay.

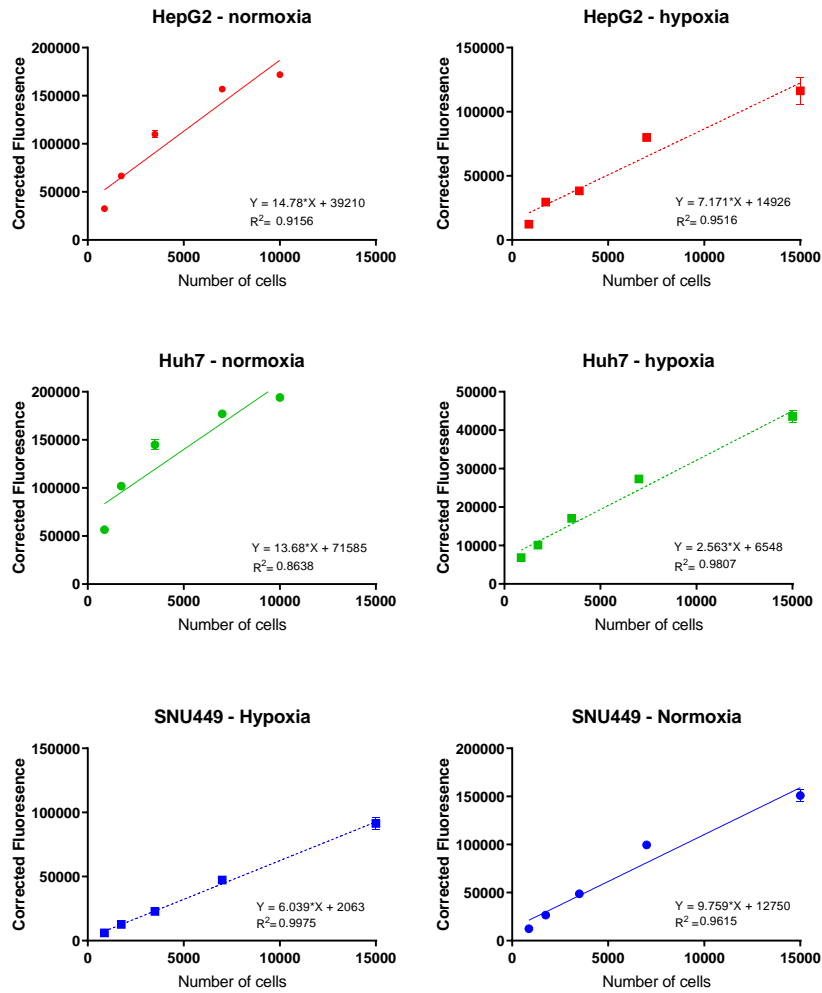

Supplement: cancers-11-01024-s001.pdf [file cancers-11-01024-s001.pdf]
